# Supplementary material
Source: PubMed Central journal article supplement (PMC3697469)
Supplement: EC.00021-13_zek999094120so1.pdf [file EC.00021-13_zek999094120so1.pdf]

## SUPPLEMENTAL DATASETS AND TABLES

**Dataset S1: Microarray dataset comparing gene transcript levels following exposure to tunicamycin versus control.** Dataset S1 lists mRNAs that increased after 1 hr, 10  $\mu$ M treatment of extracellular tachyzoites with tunicamycin ( $p < 0.05$  and FDR  $< 0.05$ ). Data represents three biological replicates that were filtered for statistical significance ( $p \leq 0.05$  and FDR  $< 0.05$ ).

**Dataset S2: List of genes as defined by probesets that are suggested to be subject to preferential translation in response to tunicamycin.** Data represents probe sets that showed a statistically significant ( $p \leq 0.02$ ) increase in gene transcripts associated with polysomes following a 1 hour treatment with 10  $\mu$ M tunicamycin as compared to non-stressed conditions.

**Table S1: Quantitative PCR confirmation of select microarray analyses of induced and repressed gene transcripts in response to ER stress.**

| Gene ID          | Function                          | Microarray | qPCR  |
|------------------|-----------------------------------|------------|-------|
| <b>ENHANCED</b>  |                                   |            |       |
| TGME49_077230    | Calreticulin-family member domain | 3.44       | 11.37 |
| TGME49_017160    | Derlin-1                          | 6.97       | 13.63 |
| TGME49_095670    | E3 ligase                         | 2.8        | 4.74  |
| TGME49_014170    | RAB geranylgeranyl transferase    | 4.14       | 3.28  |
| <b>REPRESSED</b> |                                   |            |       |
| TGME49_226930    | hypothetical protein              | -2.91      | -2.15 |
| TGME49_268560    | RAD2 endonuclease-related         | -4.45      | -3.11 |
| TGME49_218590    | protein phosphatase 2C, putative  | -3.23      | -2.44 |
| TGME49_268830    | hypothetical protein              | -2.6       | -1.89 |

Four enhanced or repressed genes were examined following exposure to tunicamycin. In each case, the trend in gene expression as measured by qPCR was similar to that reported in the microarray data.

**Table S2: Quantitative PCR confirmation of select microarray analyses of induced and repressed polysomal RNA association in response to ER stress.**

| Product                         | ToxoDB Version 5 ID | Microarray | qPCR       |
|---------------------------------|---------------------|------------|------------|
| <b>ENHANCED</b>                 |                     |            |            |
| AP2X-9                          | TGME49_015150       | 23%        | 9 ± 0.4%   |
| AP2IV-5                         | TGME49_011720       | 49%        | 31 ± 1.2%  |
| AP2VIIb-3                       | TGME49_055220       | 25%        | 12 ± 0.7%  |
| AP2XII-4                        | TGME49_047700       | 20%        | 18 ± 0.7%  |
| TgGCN5-B                        | TGME49_043440       | 33%        | 37 ± 0.9%  |
| TgGCN1                          | TGME49_031480       | 30%        | 26 ± 1.5%  |
| <b>REPRESSED</b>                |                     |            |            |
| TgDHFR-TS                       | TGME49_049180       | -23%       | -11 ± 0.8% |
| Protein Phosphatase Inhibitor 2 | TGME49_032760       | -31%       | -21 ± .6%  |
| N-term Cyclin                   | TGME49_066900       | -30%       | -29 ± 1.1% |

Changes in mRNA association with polysomes were measured by qPCR for 6 enhanced and 3 repressed genes following exposure to tunicamycin. In each case, the microarray and qPCR data showed similar trends.

**Table S3: Primers used for quantitative PCR**

| Primer sequence (5' to 3') | Primer name                    | Use                                       |
|----------------------------|--------------------------------|-------------------------------------------|
| GAGGCCGACGACCTAGAAGA       | Calreticulin qF                | measure changes in transcript levels      |
| AACCCACTGCGTCTCTAAAGAAA    | Calreticulin qF                | measure changes in transcript levels      |
| ATCTTTGGCGTCGGTTCGTA       | Derlin 1 qF                    | measure changes in transcript levels      |
| ACAAACGCGTACTCGGATTCC      | Derlin 1 qR                    | measure changes in transcript levels      |
| CGACGGTGGAAAGTCGGTAGA      | E3 ligase prot qF              | measure changes in transcript levels      |
| CAAGGGTGGCCACAGAAGAA       | E3 ligase prot qR              | measure changes in transcript levels      |
| GCACTCGAGCCTTCTTGCA        | geranylgeranyl transferase qF  | measure changes in transcript levels      |
| CGTTTGTTGTCGAGAGAGATTG     | geranylgeranyl transferase qR  | measure changes in transcript levels      |
| AAAGTCGAGAGGATGGGAGTTG     | hypothetical_226930 qF         | measure changes in transcript levels      |
| AAGCCCCAGAAGCTTTTTTCG      | hypothetical_226930 qR         | measure changes in transcript levels      |
| GCCTCCGGTACTCAGATCA        | RAD2 endonuclease qF           | measure changes in transcript levels      |
| GGTCGGACTCATCGGCATAT       | RAD2 endonuclease qR           | measure changes in transcript levels      |
| GCGACGGAGTCTGGGACTT        | Protein phosphatase 2C qF      | measure changes in transcript levels      |
| GCACGAGCTGCTCTGTCTT        | Protein phosphatase 2C qR      | measure changes in transcript levels      |
| AGTTCGGTTCGGTCGTTTGT       | hypothetical_268830 qF         | measure changes in transcript levels      |
| CTTGCGTCCCGTTTAAAG         | hypothetical_268830 qR         | measure changes in transcript levels      |
| GTGCTCGTTACCCGCTGAGT       | AP2X-9 qF                      | measure changes in translation efficiency |
| GGAAACCTTGCGGAGTATCG       | AP2X-9 qR                      | measure changes in translation efficiency |
| CGAAGCACGACAGTGAAGCA       | AP2IV-5 qF                     | measure changes in translation efficiency |
| AGGGATCGTGGCTGTGTTTC       | AP2IV-5 qR                     | measure changes in translation efficiency |
| AGCGTTTTCTGCAAGTATCG       | AP2Viiib-3 qF                  | measure changes in translation efficiency |
| TCGTTGTTGGTCGGCACAT        | AP2Viiib-3 qR                  | measure changes in translation efficiency |
| CTGCACCCGTTCTGTAAAGGA      | AP2XII-4 qR                    | measure changes in translation efficiency |
| AACACCACCACTCGCATCTG       | AP2XII-4 qF                    | measure changes in translation efficiency |
| ACGAAGTTCAGTTGATGTTCAAGAA  | GCN5-B qR                      | measure changes in translation efficiency |
| GTTACGGAACTTGCCAGCTCGTT    | GCN5-B qF                      | measure changes in translation efficiency |
| ATGCGATCTGGCGTCTTTGT       | GCN1 qF                        | measure changes in translation efficiency |
| CCGAAACGCGAAGAGCATAG       | GCN1 qR                        | measure changes in translation efficiency |
| GAGACCGTTCCCATTTGTGA       | DHFR qF                        | measure changes in translation efficiency |
| CGTAGCCACGACCTCAAAA        | DHFR qR                        | measure changes in translation efficiency |
| ATGTGGAGACGGCAGTTTCC       | Protein Phosphatase Inhib 2 qF | measure changes in translation efficiency |
| CAAGAGAGCTCCGAAAATCG       | Protein Phosphatase Inhib 2 qR | measure changes in translation efficiency |
| ACTGGAAGGCCGAGACAATG       | N-term cyclin qR               | measure changes in translation efficiency |
| TGCGTGGGAGCTGAAAGAA        | N-term cyclin qF               | measure changes in translation efficiency |
| GGAGTTTTCGGCATTGTTA        | RNA Spike qF                   | normalize data                            |
| GCATTTTCTTTCACAGCTTCGA     | RNA Spike qR                   | normalize data                            |

List of primers used to confirm the fidelity of the microarray analysis.
